# Supplementary material
Source: PubMed Central journal article supplement (PMC7124267)

**Fig. S1**

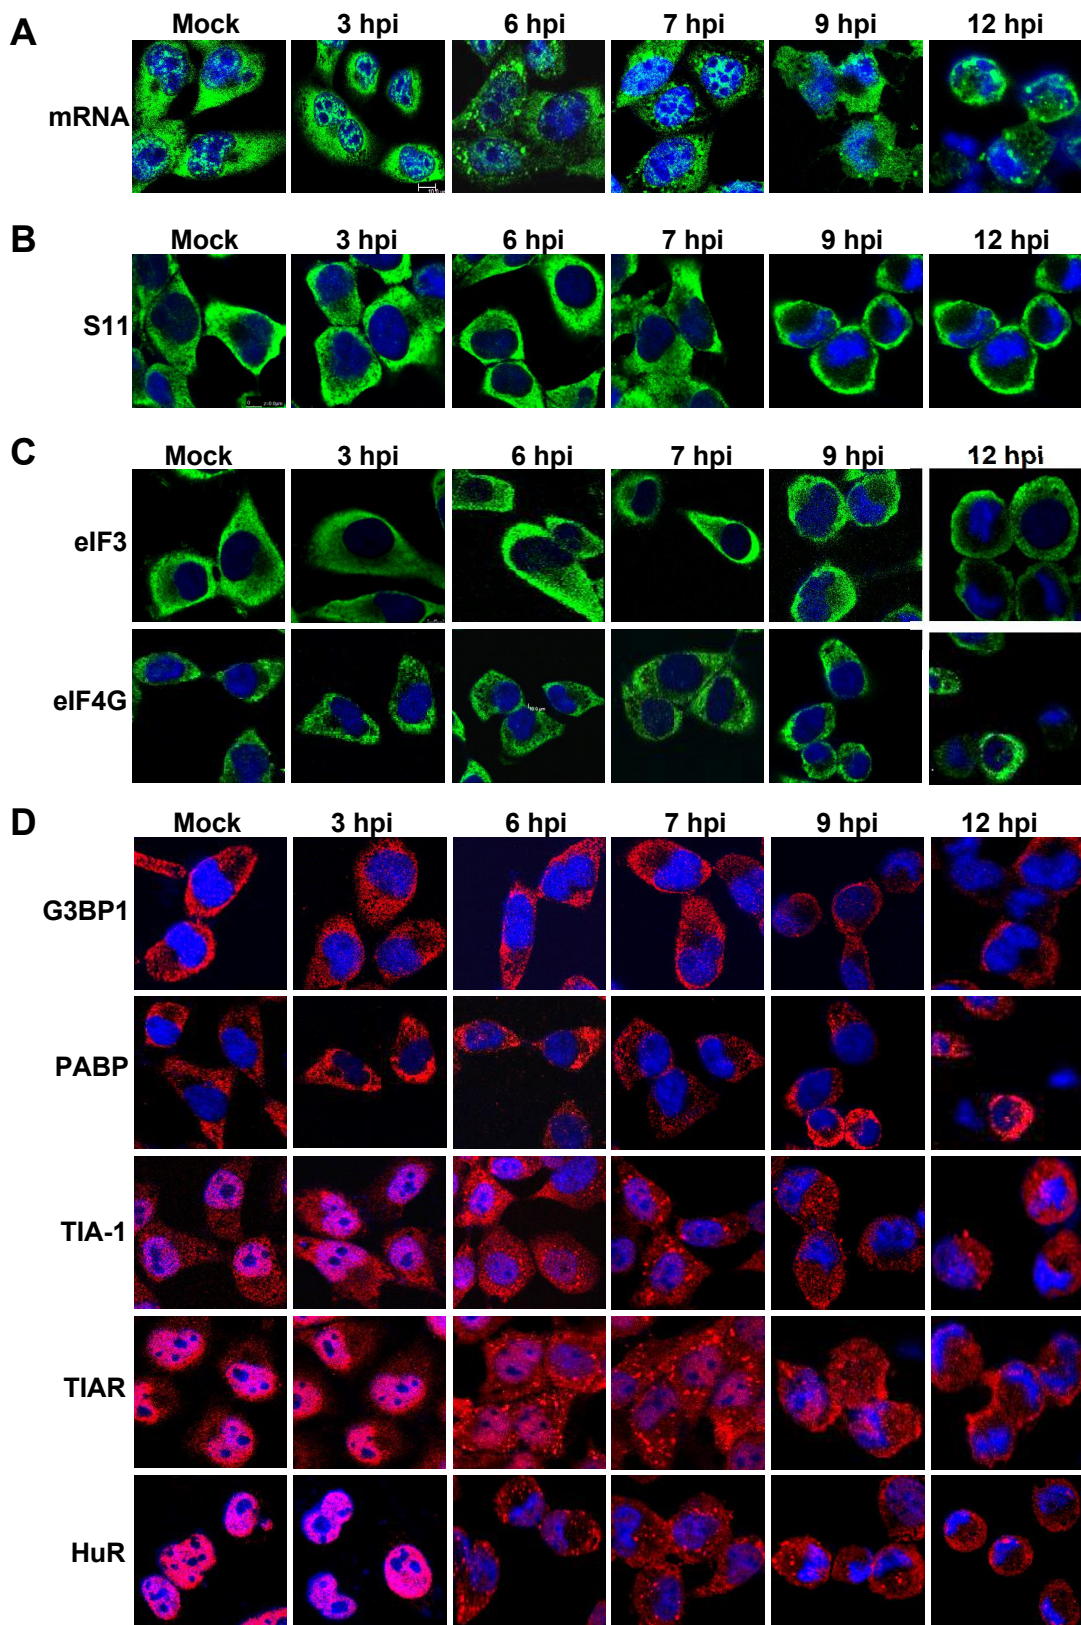

**Fig. S2**

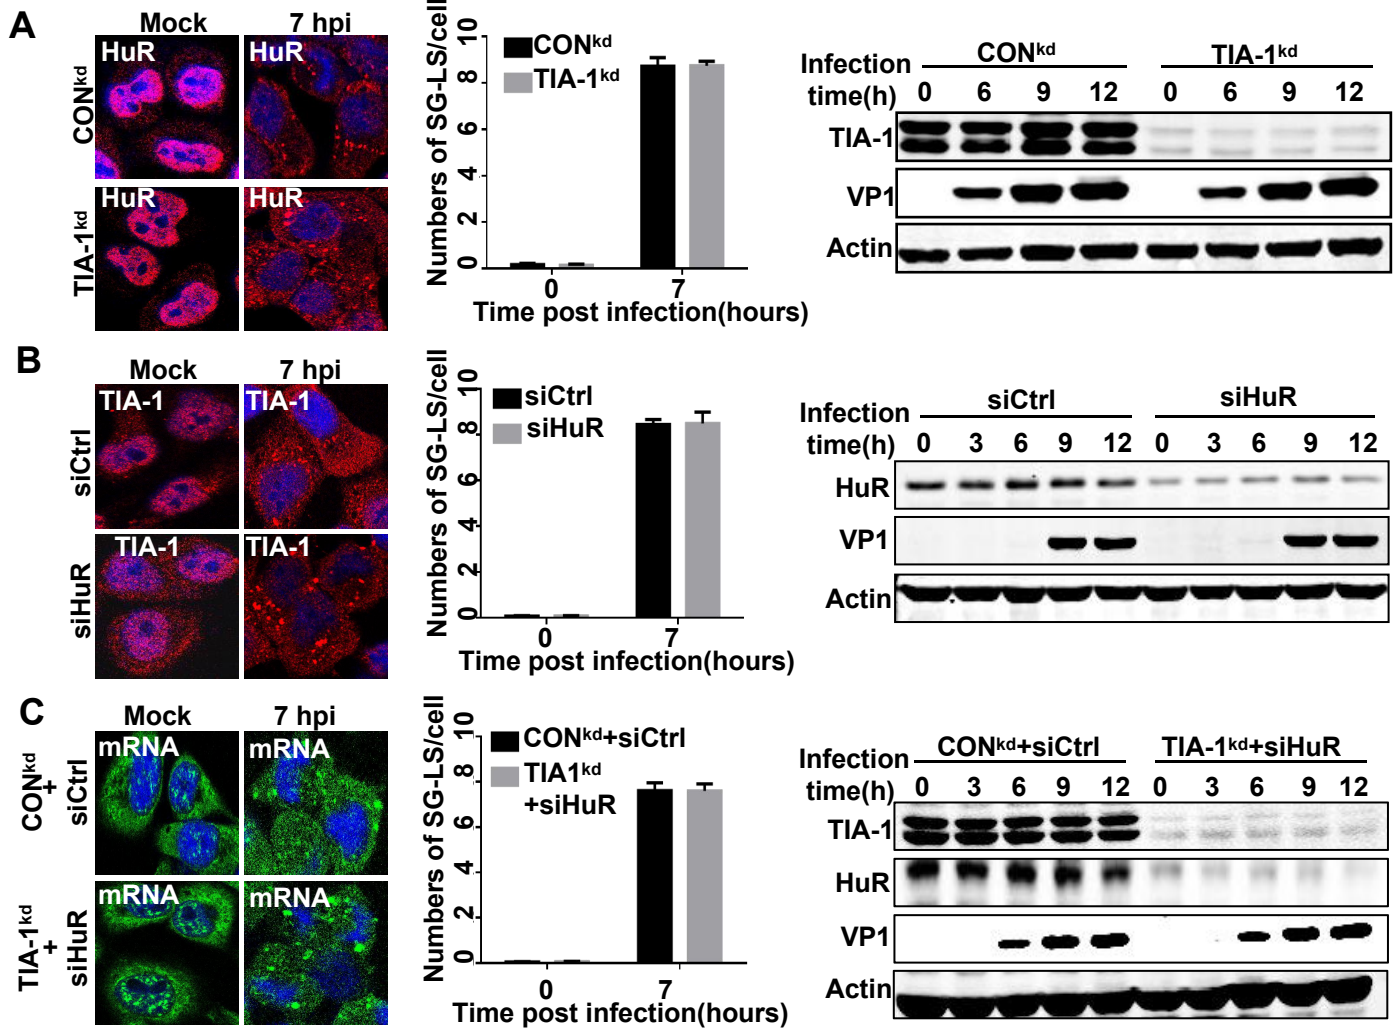

**Fig. S3**

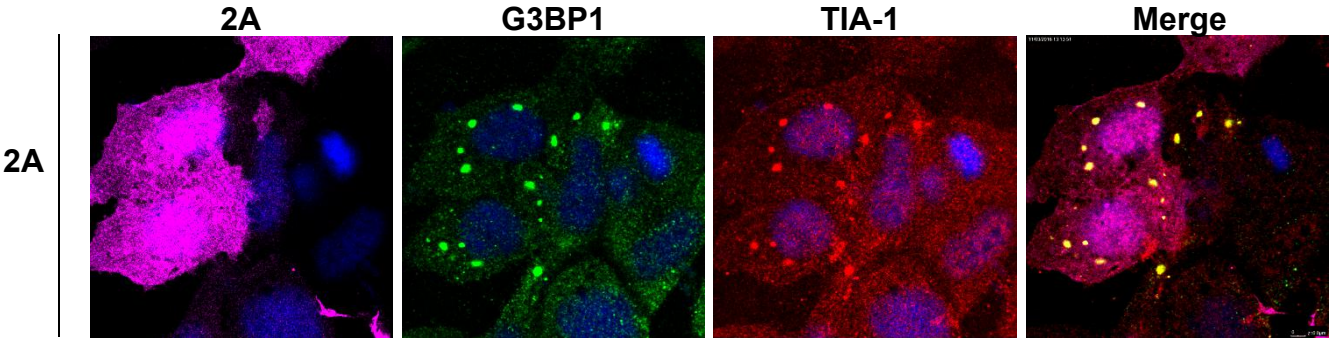

Supplement: mmc2.pdf [file mmc2.pdf]
